# Supplementary material for: Golgi enzymes do not cycle through the endoplasmic reticulum during protein secretion or mitosis
Source: PubMed Central journal article supplement — Mol Biol Cell. 2017 Jan 1;28(1):141–51. doi: 10.1091/mbc.E16-08-0560 (PMC5221618; doi:10.1091/mbc.e16-08-0560), 2017-01-01
Supplement: supp_E16-08-0560v1_CombinedSupMats.pdf [file supp_E16-08-0560v1_CombinedSupMats.pdf]

# Supplemental Materials

*Molecular Biology of the Cell*

Villeneuve et al.

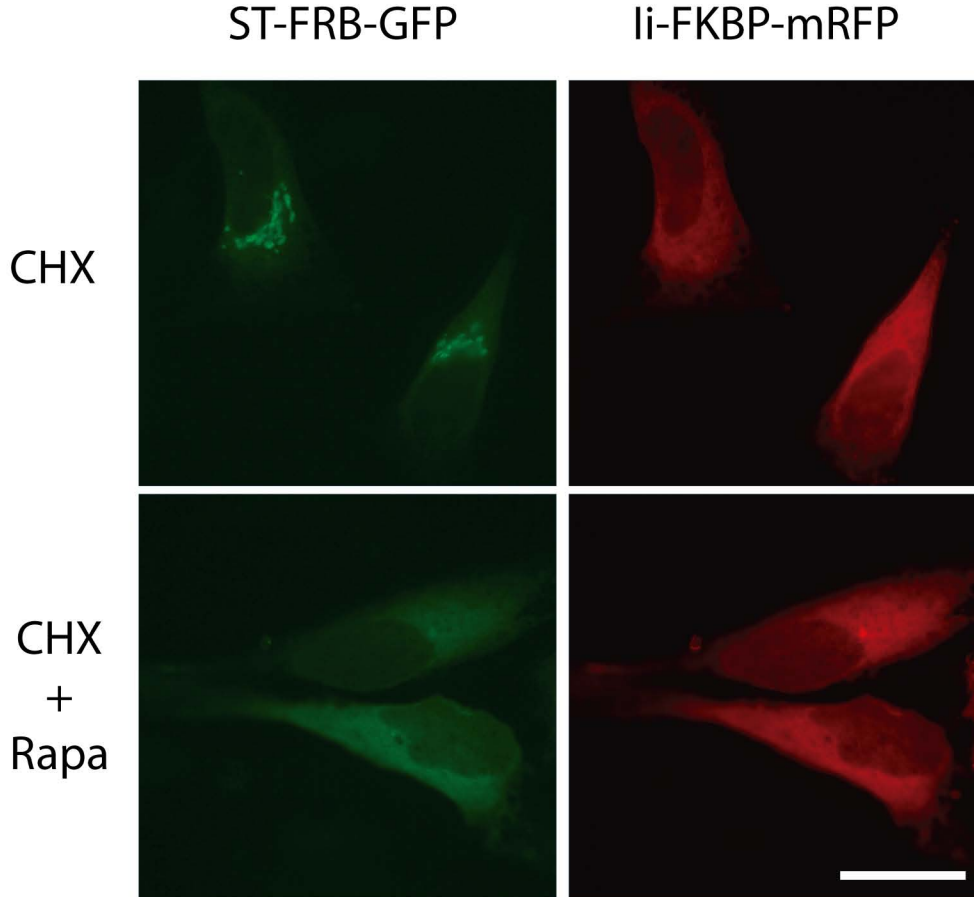

Supplemental Figure 1: B1 HeLa cells were cotransfected with ST-FRB-GFP and li-FKBP-mRFP, treated with CHX only (control) or CHX and rapamycin and fixed with PFA after 4 h. GFP and mRFP was visualized by epifluorescence (scale bar is 25  $\mu$ m).

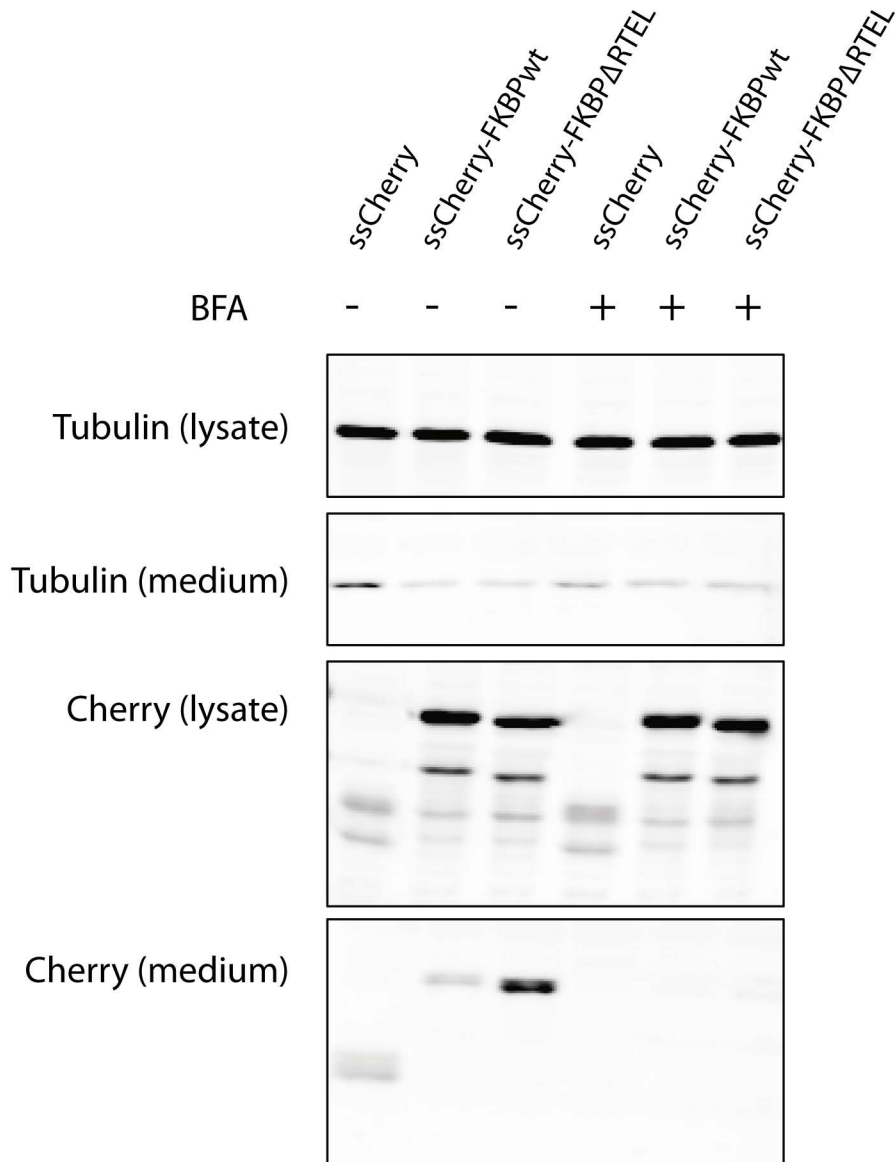

Supplemental figure 2: HeLa cells were transfected with *ssCherry*, *ssCherry-FKBP13<sup>wt</sup>* or *ssCherry-FKBP13 $\Delta$ RTEL*. After 16 h, the medium was washed and substituted with OptiMEM without serum. BFA was added to some wells (1  $\mu$ g/mL) to stop secretion. After 6 h, medium was collected, cleared by centrifugation and precipitated with trichloroacetic acid. Cell lysates and medium precipitates were loaded on acrylamide gels and western blotted with anti-Cherry and anti-tubulin antibodies.

**A**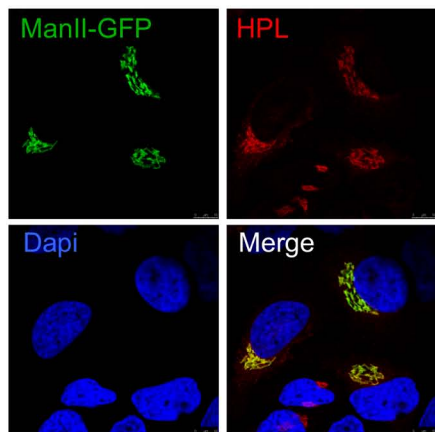**B**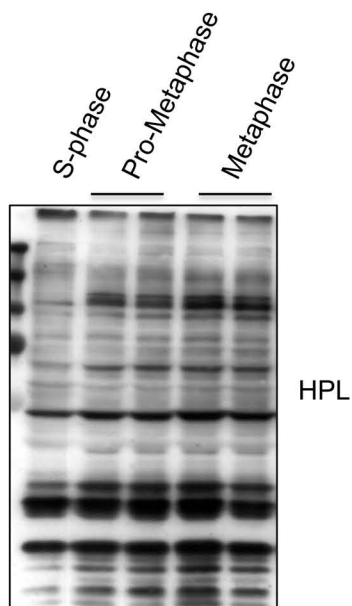

Supplemental figure 3: (A) HeLa cells expressing ManII-GFP grown on coverslip were fixed and processed for immunofluorescence microscopy with Alexa 647-conjugated HPL and DAPI (scale bar is 10 μm). (B) Lysate from cells synchronized in S-phase, pro-metaphase and metaphase were analyzed by western blotting with HRP-conjugated HPL to observe possible changes in overall O-glycosylation.

**A**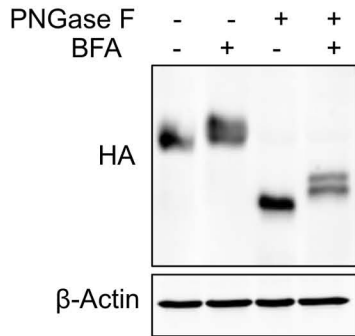**B**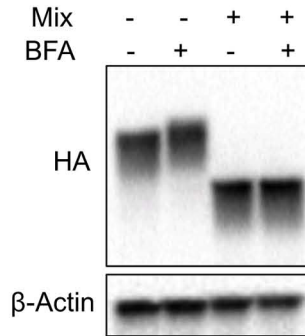

Supplemental figure 4: HeLa cells were transfected with li-FRB-HA plasmid and synchronized in metaphase (double thymidine block + nocodazole + MG132 with or without BFA). Then total cell lysates were treated with or without PNGase F (A) and protein deglycosylation mix supplemented with additional exoglycosidases (B) and analyzed by western blotting with an anti-HA and an anti- $\beta$ -actin antibody, respectively.
